# Supplementary material for: Technical note: Late Pliocene age control and composite depths at ODP Site 982, revisited
Source: Copernicus journal article supplement (doi:10.5194/cp-8-79-2012), 2012-01-06
Supplement: Supplementary file 1 [file cp-8-79-2012-supplement.pdf]

Fig. S1

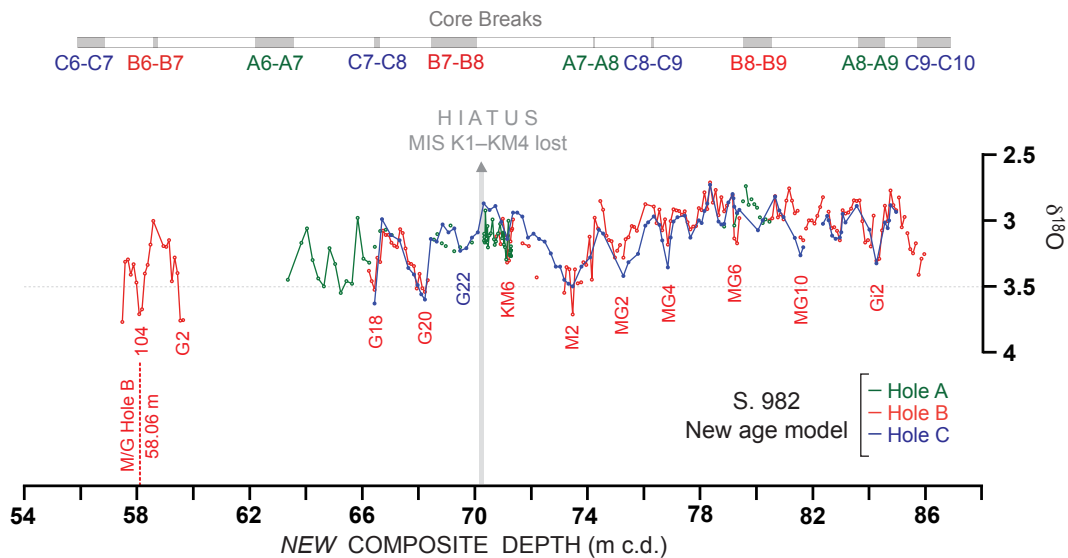

Fig. S2

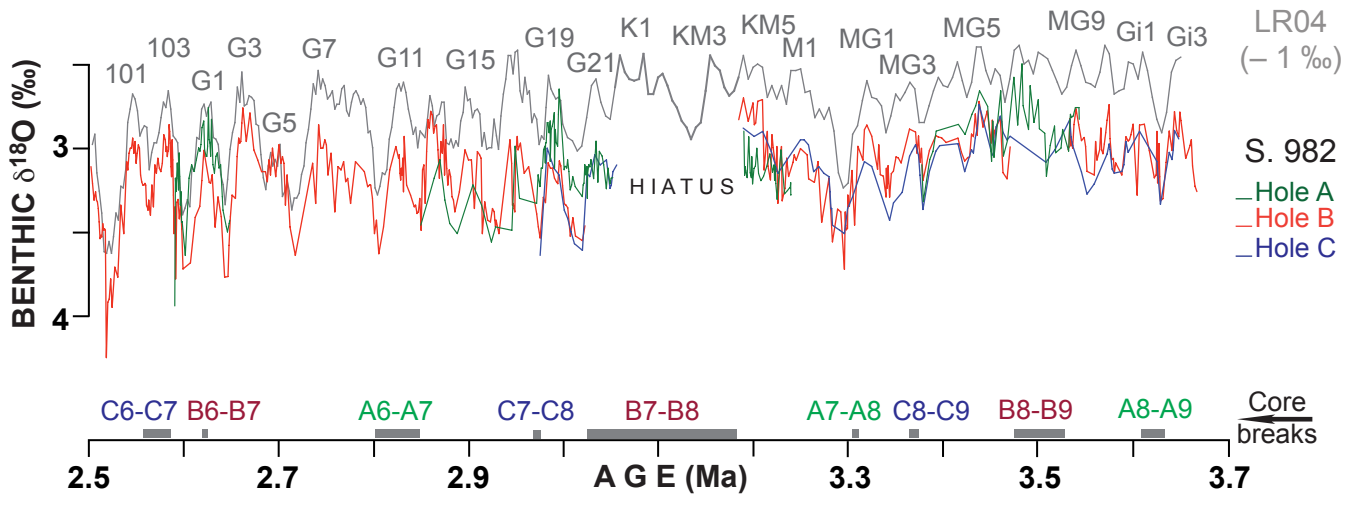

Fig. S3

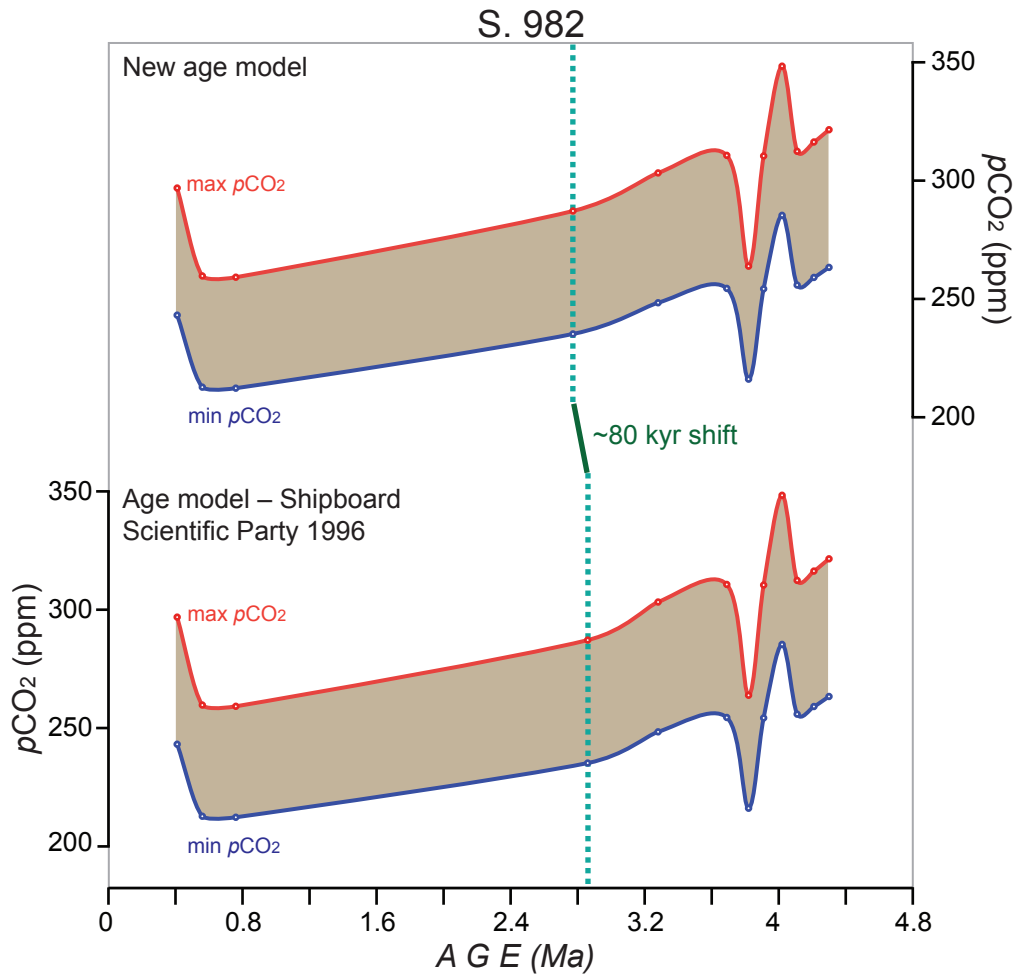

**Table S1.** Summary of stable isotope data measured in this study at ODP Site 982.

| sample # | Sample ID           | MBSF  | (previous) MCD | new MCD | AGE (kyr) | Cib. $\delta^{18}\text{O}$ | Corr. Cib. $\delta^{18}\text{O}$ | Cib. $\delta^{13}\text{C}$ |
|----------|---------------------|-------|----------------|---------|-----------|----------------------------|----------------------------------|----------------------------|
| 1        | 162-982-B-6H-6, 100 | 52,00 | 57,51          | 57,51   | 2591,981  | 3,13                       | 3,77                             | 0,74                       |
| 2        | 162-982-B-6H-6, 110 | 52,10 | 57,61          | 57,61   | 2593,279  | 2,67                       | 3,31                             | 0,55                       |
| 3        | 162-982-B-6H-6, 120 | 52,20 | 57,71          | 57,71   | 2594,577  | 2,66                       | 3,30                             | 0,84                       |
| 4        | 162-982-B-6H-6, 130 | 52,30 | 57,81          | 57,81   | 2595,875  | 2,77                       | 3,41                             | 1,00                       |
| 5        | 162-982-B-6H-6, 140 | 52,40 | 57,91          | 57,91   | 2597,172  | 2,69                       | 3,33                             | 0,88                       |
| 6        | 162-982-B-6H-7, 0   | 52,50 | 58,01          | 58,01   | 2598,470  | 2,83                       | 3,47                             | 1,02                       |
| 7        | 162-982-B-6H-7, 10  | 52,60 | 58,11          | 58,11   | 2599,768  | 3,07                       | 3,71                             | 1,07                       |
| 8        | 162-982-B-6H-7, 20  | 52,70 | 58,21          | 58,21   | 2607,614  | 3,03                       | 3,67                             | 1,08                       |
| 9        | 162-982-B-6H-7, 30  | 52,80 | 58,31          | 58,31   | 2612,606  | 2,76                       | 3,40                             | 1,02                       |
| 10       | 162-982-B-6H-7, 40  | 52,90 | 58,41          | 58,41   | 2617,461  | 2,70                       | 3,34                             | 0,81                       |
| 11       | 162-982-B-6H-CC, 0  | 53,00 | 58,51          | 58,51   | 2619,596  | 2,54                       | 3,18                             | 1,28                       |
| 12       | 162-982-B-6H-CC, 10 | 53,10 | 58,61          | 58,61   | 2621,730  | 2,36                       | 3,00                             | 1,19                       |
| 13       | 162-982-B-7H-1, 20  | 53,20 | 58,97          | 58,97   | 2627,370  | 2,55                       | 3,19                             | 1,05                       |
| 14       | 162-982-B-7H-1, 30  | 53,30 | 59,07          | 59,07   | 2628,824  | 2,56                       | 3,20                             | 0,96                       |
| 15       | 162-982-B-7H-1, 40  | 53,40 | 59,17          | 59,17   | 2630,505  | 2,51                       | 3,15                             | 1,05                       |
| 16       | 162-982-B-7H-1, 50  | 53,50 | 59,27          | 59,27   | 2633,571  | 2,82                       | 3,46                             | 0,96                       |
| 17       | 162-982-B-7H-1, 60  | 53,60 | 59,37          | 59,37   | 2636,636  | 2,64                       | 3,28                             | 0,88                       |
| 18       | 162-982-B-7H-1, 70  | 53,70 | 59,47          | 59,47   | 2640,052  | 2,76                       | 3,40                             | 1,13                       |
| 19       | 162-982-B-7H-1, 80  | 53,80 | 59,57          | 59,57   | 2643,598  | 3,12                       | 3,76                             | 0,91                       |
| 20       | 162-982-B-7H-1, 90  | 53,90 | 59,67          | 59,67   | 2647,155  | 3,12                       | 3,76                             | 0,81                       |
| 21       | 162-982-A-7H-1, 0,5 | 55,71 | 63,68          | 63,39   | 2850,550  | 2,81                       | 3,45                             | 0,86                       |
| 22       | 162-982-A-7H-1, 20  | 55,90 | 63,87          | 63,87   | 2864,600  | 2,53                       | 3,17                             | 1,04                       |
| 23       | 162-982-A-7H-1, 40  | 56,10 | 64,07          | 64,07   | 2870,694  | 2,42                       | 3,06                             | 0,96                       |
| 24       | 162-982-A-7H-1, 60  | 56,30 | 64,27          | 64,27   | 2875,892  | 2,66                       | 3,30                             | 0,76                       |
| 25       | 162-982-A-7H-1, 80  | 56,50 | 64,47          | 64,47   | 2881,018  | 2,80                       | 3,44                             | 1,04                       |
| 26       | 162-982-A-7H-1, 100 | 56,70 | 64,67          | 64,67   | 2888,904  | 2,86                       | 3,50                             | 0,77                       |

|    |                      |       |       |       |          |      |      |      |
|----|----------------------|-------|-------|-------|----------|------|------|------|
| 27 | 162-982-A-7H-1, 120  | 56,90 | 64,87 | 64,87 | 2905,377 | 2,57 | 3,21 | 0,96 |
| 28 | 162-982-A-7H-1, 140  | 57,10 | 65,07 | 65,07 | 2914,473 | 2,69 | 3,33 | 1,13 |
| 29 | 162-982-A-7H-2, 10   | 57,30 | 65,27 | 65,27 | 2924,801 | 2,91 | 3,55 | 0,75 |
| 30 | 162-982-A-7H-2, 30   | 57,50 | 65,47 | 65,47 | 2929,221 | 2,82 | 3,46 | 0,68 |
| 31 | 162-982-A-7H-2, 50   | 57,70 | 65,67 | 65,67 | 2946,355 | 2,84 | 3,48 | 0,96 |
| 32 | 162-982-A-7H-2, 70   | 57,90 | 65,87 | 65,87 | 2949,731 | 2,34 | 2,98 | 0,40 |
| 33 | 162-982-A-7H-2, 90,5 | 58,11 | 66,08 | 66,08 | 2954,355 | 2,65 | 3,29 | 0,66 |
| 34 | 162-982-B-7H-6, 0    | 60,50 | 66,27 | 66,27 | 2972,227 | 2,74 | 3,38 | 0,51 |
| 35 | 162-982-A-7H-2, 111  | 58,31 | 66,28 | 66,28 | 2972,399 | 2,68 | 3,32 | 0,34 |
| 36 | 162-982-B-7H-6, 10   | 60,60 | 66,37 | 66,37 | 2973,941 | 2,82 | 3,46 | 0,36 |
| 37 | 162-982-B-7H-6, 20   | 60,70 | 66,47 | 66,47 | 2975,857 | 2,89 | 3,53 | 0,94 |
| 38 | 162-982-C-8H-1, 3    | 60,83 | 66,62 | 66,62 | 2975,857 | 2,99 | 3,63 | 0,65 |
| 39 | 162-982-A-7H-2, 131  | 58,51 | 66,48 | 66,48 | 2976,194 | 2,56 | 3,20 | 0,76 |
| 40 | 162-982-B-7H-6, 32   | 60,82 | 66,59 | 66,57 | 2979,233 | 2,64 | 3,28 | 1,03 |
| 41 | 162-982-A-7H-3, 0    | 58,70 | 66,67 | 66,67 | 2981,484 | 2,44 | 3,08 | 0,86 |
| 42 | 162-982-B-7H-6, 40   | 60,90 | 66,67 | 66,67 | 2981,484 | 2,68 | 3,32 | 0,97 |
| 43 | 162-982-C-8H-1, 20   | 61,00 | 66,79 | 66,73 | 2983,310 | 2,35 | 2,99 | 0,96 |
| 44 | 162-982-B-7H-6, 50   | 61,00 | 66,77 | 66,77 | 2984,297 | 2,44 | 3,08 | 0,92 |
| 45 | 162-982-A-7H-3, 20   | 58,90 | 66,87 | 66,87 | 2986,684 | 2,43 | 3,07 | 0,82 |
| 46 | 162-982-B-7H-6, 60   | 61,10 | 66,87 | 66,87 | 2986,684 | 2,47 | 3,11 | 0,55 |
| 47 | 162-982-B-7H-6, 70   | 61,20 | 66,97 | 66,97 | 2988,817 | 2,47 | 3,11 | 0,83 |
| 48 | 162-982-C-8H-1, 40   | 61,20 | 66,99 | 67,05 | 2990,452 | 2,47 | 3,11 | 0,92 |
| 49 | 162-982-B-7H-6, 80   | 61,30 | 67,07 | 67,07 | 2990,951 | 2,53 | 3,17 | 0,78 |
| 50 | 162-982-A-7H-3, 41   | 59,11 | 67,08 | 67,08 | 2991,160 | 2,47 | 3,11 | 0,83 |
| 51 | 162-982-B-7H-6, 90   | 61,40 | 67,17 | 67,17 | 2993,035 | 2,55 | 3,19 | 0,87 |
| 52 | 162-982-B-7H-6, 100  | 61,50 | 67,27 | 67,27 | 2994,468 | 2,56 | 3,20 | 0,87 |
| 53 | 162-982-C-8H-1, 60   | 61,40 | 67,19 | 67,36 | 2995,734 | 2,51 | 3,15 | 0,73 |
| 54 | 162-982-B-7H-6, 111  | 61,61 | 67,38 | 67,38 | 2996,045 | 2,43 | 3,07 | 0,78 |
| 55 | 162-982-B-7H-6, 120  | 61,70 | 67,47 | 67,47 | 2997,606 | 2,46 | 3,10 | 0,91 |
| 56 | 162-982-B-7H-6, 130  | 61,80 | 67,57 | 67,57 | 2999,445 | 2,57 | 3,21 | 0,74 |

|    |                     |       |       |       |          |      |      |      |
|----|---------------------|-------|-------|-------|----------|------|------|------|
| 57 | 162-982-B-7H-6, 140 | 61,90 | 67,67 |       |          | 2,68 | 3,32 | 1,04 |
| 58 | 162-982-C-8H-1, 80  | 61,60 | 67,39 | 67,67 | 3001,283 | 2,72 | 3,36 | 0,69 |
| 59 | 162-982-B-7H-7, 0   | 62,00 | 67,77 | 67,77 | 3003,122 | 2,69 | 3,33 | 1,05 |
| 60 | 162-982-B-7H-7, 10  | 62,10 | 67,87 |       |          | 2,71 | 3,35 | 0,95 |
| 61 | 162-982-C-8H-1, 100 | 61,80 | 67,59 | 67,87 | 3004,961 | 2,77 | 3,41 | 0,76 |
| 62 | 162-982-B-7H-7, 20  | 62,20 | 67,97 | 67,97 | 3007,630 | 2,88 | 3,52 | 0,89 |
| 63 | 162-982-C-8H-1, 120 | 62,00 | 67,79 | 68,00 | 3008,444 | 2,85 | 3,49 | 1,08 |
| 64 | 162-982-B-7H-7, 30  | 62,30 | 68,07 | 68,07 | 3010,343 | 2,77 | 3,41 | 0,43 |
| 65 | 162-982-C-8H-1, 140 | 62,20 | 67,99 | 68,13 | 3011,970 | 2,92 | 3,56 | 0,67 |
| 66 | 162-982-B-7H-7, 40  | 62,40 | 68,17 | 68,17 | 3013,055 | 2,87 | 3,51 | 0,76 |
| 67 | 162-982-B-7H-CC, 0  | 62,49 | 68,26 |       |          | 2,90 | 3,54 | 0,78 |
| 68 | 162-982-C-8H-2, 10  | 62,40 | 68,19 | 68,26 | 3020,410 | 2,96 | 3,60 | 0,6  |
| 69 | 162-982-B-7H-CC, 10 | 62,59 | 68,36 | 68,36 | 3023,056 | 2,81 | 3,45 | 0,74 |
| 70 | 162-982-C-8H-2, 30  | 62,60 | 68,39 | 68,47 | 3025,264 | 2,50 | 3,14 | 0,69 |
| 71 | 162-982-A-7H-4, 26  | 60,46 | 68,43 | 68,58 | 3026,000 | 2,51 | 3,15 | 0,60 |
| 72 | 162-982-C-8H-2, 50  | 62,80 | 68,59 | 68,68 | 3028,098 | 2,52 | 3,16 | 0,8  |
| 73 | 162-982-A-7H-4, 38  | 60,58 | 68,55 | 68,70 | 3028,427 | 2,46 | 3,10 | 0,90 |
| 74 | 162-982-A-7H-4, 54  | 60,74 | 68,71 | 68,86 | 3032,321 | 2,53 | 3,17 | 0,94 |
| 75 | 162-982-C-8H-2, 70  | 63,00 | 68,79 | 68,89 | 3033,466 | 2,39 | 3,03 | 0,64 |
| 76 | 162-982-A-7H-4, 68  | 60,88 | 68,85 | 69,00 | 3036,759 | 2,55 | 3,19 | 0,76 |
| 77 | 162-982-C-8H-2, 90  | 63,20 | 68,99 | 69,10 | 3039,039 | 2,45 | 3,09 | 0,68 |
| 78 | 162-982-A-7H-4, 85  | 61,05 | 69,02 | 69,17 | 3041,189 | 2,40 | 3,04 | 0,68 |
| 79 | 162-982-A-7H-4, 98  | 61,18 | 69,15 |       |          | 2,59 | 3,23 | 0,86 |
| 80 | 162-982-C-8H-2, 110 | 63,40 | 69,19 | 69,30 | 3045,676 | 2,42 | 3,06 | 0,72 |
| 81 | 162-982-A-7H-4, 114 | 61,34 | 69,31 |       |          | 2,56 | 3,20 | 0,56 |
| 82 | 162-982-C-8H-2, 130 | 63,60 | 69,39 | 69,51 | 3049,459 | 2,59 | 3,23 | 0,6  |
| 83 | 162-982-C-8H-3, 1   | 63,81 | 69,60 | 69,73 | 3050,800 | 2,57 | 3,21 | 0,68 |
| 84 | 162-982-A-7H-4, 128 | 61,48 | 69,45 |       |          | 2,53 | 3,17 | 0,65 |
| 85 | 162-982-C-8H-3, 20  | 64,00 | 69,79 | 69,93 | 3052,524 | 2,49 | 3,13 | 0,51 |
| 86 | 162-982-C-8H-3, 40  | 64,20 | 69,99 | 70,14 | 3056,537 | 2,45 | 3,09 | 0,79 |

|     |                     |       |       |        |          |      |      |      |
|-----|---------------------|-------|-------|--------|----------|------|------|------|
| 87  | 162-982-C-8H-3, 60  | 64,40 | 70,19 | 70,35  | 3189,643 | 2,23 | 2,87 | 0,8  |
| 88  | 162-982-A-7H-4, 145 | 61,65 | 69,62 | 70,36  | 3191,094 | 2,51 | 3,15 | 0,78 |
| 89  | 162-982-A-7H-5, 2,5 | 61,73 | 69,70 | 70,4   | 3191,680 | 2,46 | 3,10 | 0,78 |
| 90  | 162-982-A-7H-5, 10  | 61,80 | 69,77 | 70,372 | 3192,266 | 2,49 | 3,13 | 0,86 |
| 91  | 162-982-C-8H-3, 80  | 64,60 | 70,39 | 70,56  | 3201,269 | 2,28 | 2,92 | 0,71 |
| 92  | 162-982-A-7H-5, 20  | 61,90 | 69,87 | 70,39  | 3193,750 | 2,53 | 3,17 | 0,88 |
| 93  | 162-982-A-7H-5, 30  | 62,00 | 69,97 | 70,41  | 3195,450 | 2,28 | 2,92 | 0,91 |
| 94  | 162-982-A-7H-5, 40  | 62,10 | 70,07 | 70,44  | 3196,950 | 2,50 | 3,14 | 0,89 |
| 95  | 162-982-A-7H-5, 50  | 62,20 | 70,17 | 70,47  | 3198,150 | 2,53 | 3,17 | 0,63 |
| 96  | 162-982-A-7H-5, 60  | 62,30 | 70,27 | 70,481 | 3198,65  | 2,40 | 3,04 | 0,68 |
| 97  | 162-982-C-8H-3, 100 | 64,80 | 70,59 | 70,76  | 3210,180 | 2,25 | 2,89 | 0,48 |
| 98  | 162-982-A-7H-5, 70  | 62,40 | 70,37 | 70,50  | 3199,450 | 2,56 | 3,20 | 0,82 |
| 99  | 162-982-B-8H-2, 20  | 64,20 | 71,03 | 70,80  | 3211,714 | 2,48 | 3,12 | 0,76 |
| 100 | 162-982-A-7H-5, 80  | 62,50 | 70,47 | 70,54  | 3200,950 | 2,47 | 3,11 | 0,84 |
| 101 | 162-982-B-8H-2, 32  | 64,32 | 71,15 | 70,89  | 3215,789 | 2,46 | 3,10 | 0,84 |
| 102 | 162-982-B-8H-2, 40  | 64,40 | 71,23 | 70,95  | 3218,381 | 2,54 | 3,18 | 0,77 |
| 103 | 162-982-C-8H-3, 120 | 65,00 | 70,79 | 70,97  | 3219,311 | 2,37 | 3,01 | 0,69 |
| 104 | 162-982-A-7H-5, 90  | 62,60 | 70,57 | 70,60  | 3202,450 | 2,46 | 3,10 | 0,88 |
| 105 | 162-982-A-7H-5, 100 | 62,70 | 70,67 | 70,661 | 3203,950 | 2,35 | 2,99 | 0,68 |
| 106 | 162-982-B-8H-2, 50  | 64,50 | 71,33 | 71,03  | 3221,300 | 2,35 | 2,99 | 0,58 |
| 107 | 162-982-B-8H-2, 62  | 64,62 | 71,45 | 71,12  | 3224,395 | 2,49 | 3,13 | 0,76 |
| 108 | 162-982-A-7H-5, 110 | 62,80 | 70,77 | 70,71  | 3205,750 | 2,50 | 3,14 | 0,78 |
| 109 | 162-982-A-7H-5, 120 | 62,90 | 70,87 | 70,74  | 3208,250 | 2,55 | 3,19 | 0,77 |
| 110 | 162-982-B-8H-2, 70  | 64,70 | 71,53 | 71,18  | 3226,161 | 2,68 | 3,32 | 1,10 |
| 111 | 162-982-C-8H-3, 140 | 65,20 | 70,99 | 71,181 | 3226,252 | 2,50 | 3,14 | 0,66 |
| 112 | 162-982-B-8H-2, 80  | 64,80 | 71,63 | 71,21  | 3228,080 | 2,47 | 3,11 | 0,85 |
| 113 | 162-982-B-8H-2, 92  | 64,92 | 71,75 | 71,246 | 3230,738 | 2,66 | 3,30 | 0,63 |
| 114 | 162-982-A-7H-5, 130 | 63,00 | 70,97 | 70,78  | 3211,000 | 2,52 | 3,16 | 0,85 |
| 115 | 162-982-B-8H-2, 100 | 65,00 | 71,83 | 71,27  | 3233,692 | 2,59 | 3,23 | 0,65 |
| 116 | 162-982-B-8H-2, 110 | 65,10 | 71,93 | 71,30  | 3237,476 | 2,52 | 3,16 | 0,89 |

|     |                     |       |       |        |          |      |      |      |
|-----|---------------------|-------|-------|--------|----------|------|------|------|
| 117 | 162-982-A-7H-5, 140 | 63,10 | 71,07 | 70,86  | 3214,333 | 2,46 | 3,10 | 0,64 |
| 118 | 162-982-B-8H-2, 122 | 65,22 | 72,05 | 71,34  | 3242,166 | 2,43 | 3,07 | 0,80 |
| 119 | 162-982-B-8H-2, 130 | 65,30 | 72,13 | 71,36  | 3245,525 | 2,42 | 3,06 | 0,89 |
| 120 | 162-982-A-7H-6, 0   | 63,20 | 71,17 | 70,93  | 3217,6   | 2,39 | 3,03 | 0,67 |
| 121 | 162-982-B-8H-2, 140 | 65,40 | 72,23 | 71,39  | 3250,000 | 2,35 | 2,99 | 0,67 |
| 122 | 162-982-C-8H-4, 10  | 65,40 | 71,19 |        |          | 2,30 | 2,94 | 0,86 |
| 123 | 162-982-A-7H-6, 10  | 63,30 | 71,27 | 71,00  | 3220,400 | 2,49 | 3,13 | 0,85 |
| 124 | 162-982-A-7H-6, 20  | 63,40 | 71,37 | 71,05  | 3222,100 | 2,45 | 3,09 | 0,40 |
| 125 | 162-982-C-8H-4, 30  | 65,60 | 71,39 | 71,54  | 3253,787 | 2,30 | 2,94 | 0,78 |
| 126 | 162-982-A-7H-6, 30  | 63,50 | 71,47 | 71,07  | 3222,600 | 2,54 | 3,18 | 0,64 |
| 127 | 162-982-A-7H-6, 40  | 63,60 | 71,57 | 71,08  | 3223,150 | 2,46 | 3,10 | 0,95 |
| 128 | 162-982-C-8H-4, 50  | 65,80 | 71,59 | 71,72  | 3258,431 | 2,33 | 2,97 | 0,71 |
| 129 | 162-982-B-8H-3, 2   | 65,52 | 72,35 | 71,73  | 3258,595 | 2,53 | 3,17 | 0,81 |
| 130 | 162-982-A-7H-6, 50  | 63,70 | 71,67 | 71,10  | 3223,900 | 2,56 | 3,20 | 0,58 |
| 131 | 162-982-A-7H-6, 60  | 63,80 | 71,77 | 71,15  | 3225,3   | 2,66 | 3,30 | 0,88 |
| 132 | 162-982-C-8H-4, 70  | 66,00 | 71,79 | 71,92  | 3263,877 | 2,49 | 3,13 | 0,9  |
| 133 | 162-982-B-8H-3, 10  | 65,60 | 72,43 | 71,95  | 3264,694 | 2,55 | 3,19 | 0,78 |
| 134 | 162-982-A-7H-6, 70  | 63,90 | 71,87 | 71,23  | 3229,300 | 2,36 | 3,00 | 0,85 |
| 135 | 162-982-C-8H-4, 90  | 66,20 | 71,99 | 72,118 | 3269,272 | 2,46 | 3,10 | 0,82 |
| 136 | 162-982-A-7H-6, 80  | 64,00 | 71,97 | 71,27  | 3233,100 | 2,62 | 3,26 | 0,92 |
| 137 | 162-982-A-7H-6, 90  | 64,10 | 72,07 | 71,29  | 3236,100 | 2,60 | 3,24 | 0,84 |
| 138 | 162-982-B-8H-3, 20  | 65,70 | 72,53 | 72,23  | 3272,337 | 2,79 | 3,43 | 0,54 |
| 139 | 162-982-C-8H-4, 110 | 66,40 | 72,19 | 72,316 | 3274,691 | 2,50 | 3,14 | 0,86 |
| 140 | 162-982-A-7H-6, 100 | 64,20 | 72,17 | 71,309 | 3238,600 | 2,59 | 3,23 | 0,97 |
| 141 | 162-982-A-7H-6, 110 | 64,30 | 72,27 | 71,312 | 3239,100 | 2,59 | 3,23 | 0,82 |
| 142 | 162-982-C-8H-4, 130 | 66,60 | 72,39 | 72,51  | 3280,021 | 2,52 | 3,16 | 0,88 |
| 143 | 162-982-A-7H-6, 120 | 64,40 | 72,37 | 71,32  | 3239,530 | 2,56 | 3,20 | 0,83 |
| 144 | 162-982-A-7H-6, 130 | 64,50 | 72,47 | 71,32  | 3239,680 | 2,63 | 3,27 | 0,84 |
| 145 | 162-982-C-8H-5, 2   | 66,82 | 72,61 | 72,73  | 3281,163 | 2,61 | 3,25 | 0,72 |
| 146 | 162-982-A-7H-6, 140 | 64,60 | 72,57 | 71,32  | 3239,922 | 2,63 | 3,27 | 0,41 |



|     |                     |       |       |       |          |      |      |      |
|-----|---------------------|-------|-------|-------|----------|------|------|------|
| 147 | 162-982-C-8H-5, 20  | 67,00 | 72,79 | 72,91 | 3282,097 | 2,71 | 3,35 | 0,6  |
| 148 | 162-982-C-8H-5, 40  | 67,20 | 72,99 | 73,06 | 3282,883 | 2,71 | 3,35 | 0,57 |
| 149 | 162-982-B-8H-3, 32  | 65,82 | 72,65 |       |          | 2,91 | 3,55 | 0,64 |
| 150 | 162-982-C-8H-5, 60  | 67,40 | 73,19 | 73,21 | 3283,670 | 2,81 | 3,45 | 0,55 |
| 151 | 162-982-B-8H-3, 40  | 65,90 | 72,73 | 73,29 | 3289,135 | 2,71 | 3,35 | 0,57 |
| 152 | 162-982-C-8H-5, 80  | 67,60 | 73,39 | 73,36 | 3291,464 | 2,84 | 3,48 | 0,75 |
| 153 | 162-982-B-8H-3, 50  | 66,00 | 72,83 | 73,39 | 3292,462 | 2,73 | 3,37 | 0,52 |
| 154 | 162-982-B-8H-3, 62  | 66,12 | 72,95 |       |          | 3,07 | 3,71 | 0,52 |
| 155 | 162-982-C-8H-5, 100 | 67,80 | 73,59 | 73,51 | 3296,295 | 2,86 | 3,50 | 0,56 |
| 156 | 162-982-B-8H-3, 70  | 66,20 | 73,03 | 73,59 | 3297,162 | 2,73 | 3,37 | 0,37 |
| 157 | 162-982-B-8H-3, 80  | 66,30 | 73,13 | 73,69 | 3298,246 | 2,84 | 3,48 | 0,59 |
| 158 | 162-982-B-8H-3, 92  | 66,42 | 73,25 | 73,81 | 3299,546 | 2,83 | 3,47 | 0,71 |
| 159 | 162-982-C-8H-5, 120 | 68,00 | 73,79 | 73,82 | 3299,654 | 2,71 | 3,35 | 0,71 |
| 160 | 162-982-B-8H-3, 100 | 66,50 | 73,33 | 73,89 | 3300,413 | 2,68 | 3,32 | 0,63 |
| 161 | 162-982-B-8H-3, 110 | 66,60 | 73,43 | 73,99 | 3301,496 | 2,70 | 3,34 | 0,64 |
| 162 | 162-982-B-8H-3, 122 | 66,72 | 73,55 | 74,11 | 3304,210 | 2,48 | 3,12 | 0,91 |
| 163 | 162-982-C-8H-5, 140 | 68,20 | 73,99 | 74,13 | 3304,910 | 2,64 | 3,28 | 0,88 |
| 164 | 162-982-B-8H-3, 130 | 66,80 | 73,63 | 74,19 | 3307,012 | 2,81 | 3,45 | 0,57 |
| 165 | 162-982-B-8H-3, 140 | 66,90 | 73,73 | 74,29 | 3310,514 | 2,34 | 2,98 | 0,78 |
| 166 | 162-982-B-8H-4, 2   | 67,02 | 73,85 | 74,41 | 3315,803 | 2,42 | 3,06 | 0,66 |
| 167 | 162-982-C-8H-6, 10  | 68,40 | 74,19 | 74,44 | 3317,342 | 2,43 | 3,07 | 0,74 |
| 168 | 162-982-B-8H-4, 10  | 67,10 | 73,93 | 74,49 | 3319,907 | 2,21 | 2,85 | 0,60 |
| 169 | 162-982-B-8H-4, 20  | 67,20 | 74,03 |       |          | 2,28 | 2,92 | 0,58 |
| 170 | 162-982-C-8H-6, 30  | 68,60 | 74,39 | 74,59 | 3325,039 | 2,46 | 3,10 | 0,51 |
| 171 | 162-982-B-8H-4, 32  | 67,32 | 74,15 | 74,71 | 3331,197 | 2,48 | 3,12 | 0,65 |
| 172 | 162-982-B-8H-4, 40  | 67,40 | 74,23 | 74,79 | 3334,076 | 2,51 | 3,15 | 0,54 |
| 173 | 162-982-B-8H-4, 50  | 67,50 | 74,33 | 74,89 | 3337,302 | 2,52 | 3,16 | 0,43 |
| 174 | 162-982-B-8H-4, 62  | 67,62 | 74,45 | 75,01 | 3340,125 | 2,64 | 3,28 | 0,68 |
| 175 | 162-982-B-8H-4, 70  | 67,70 | 74,53 | 75,09 | 3341,012 | 2,59 | 3,23 | 0,76 |
| 176 | 162-982-B-8H-4, 80  | 67,80 | 74,63 | 75,19 | 3342,120 | 2,55 | 3,19 | 0,64 |

|     |                     |       |       |       |          |      |      |      |
|-----|---------------------|-------|-------|-------|----------|------|------|------|
| 177 | 162-982-B-8H-4, 92  | 67,92 | 74,75 |       |          | 2,64 | 3,28 | 0,58 |
| 178 | 162-982-C-8H-6, 50  | 68,80 | 74,59 | 75,31 | 3343,881 | 2,78 | 3,42 | 0,43 |
| 179 | 162-982-B-8H-4, 100 | 68,00 | 74,83 | 75,39 | 3345,675 | 2,50 | 3,14 | 0,19 |
| 180 | 162-982-B-8H-4, 110 | 68,10 | 74,93 |       |          | 2,49 | 3,13 | 0,43 |
| 181 | 162-982-C-8H-6, 70  | 69,00 | 74,79 | 75,49 | 3347,918 | 2,68 | 3,32 | 0,70 |
| 182 | 162-982-B-8H-4, 122 | 68,22 | 75,05 | 75,61 | 3350,659 | 2,40 | 3,04 | 0,62 |
| 183 | 162-982-B-8H-4, 130 | 68,30 | 75,13 | 75,69 | 3353,031 | 2,41 | 3,05 | 0,51 |
| 184 | 162-982-B-8H-4, 140 | 68,40 | 75,23 | 75,79 | 3355,997 | 2,44 | 3,08 | 0,59 |
| 185 | 162-982-C-8H-6, 90  | 69,20 | 74,99 | 75,83 | 3357,176 | 2,61 | 3,25 | 0,96 |
| 186 | 162-982-B-8H-5, 20  | 68,70 | 75,53 |       |          | 2,24 | 2,88 | 0,71 |
| 187 | 162-982-C-8H-6, 110 | 69,40 | 75,19 | 76,09 | 3364,838 | 2,40 | 3,04 | 0,64 |
| 188 | 162-982-C-8H-6, 130 | 69,60 | 75,39 | 76,19 | 3366,969 | 2,37 | 3,01 | 0,49 |
| 189 | 162-982-B-8H-5, 50  | 69,00 | 75,83 |       |          | 2,25 | 2,89 | 0,58 |
| 190 | 162-982-C-8H-7, 0   | 69,80 | 75,59 | 76,39 | 3371,233 | 2,33 | 2,97 | 0,59 |
| 191 | 162-982-B-8H-5, 60  | 69,10 | 75,93 | 76,49 | 3372,785 | 2,38 | 3,02 | 0,68 |
| 192 | 162-982-B-8H-5, 70  | 69,20 | 76,03 |       |          | 2,28 | 2,92 | 0,63 |
| 193 | 162-982-C-8H-7, 20  | 70,00 | 75,79 | 76,59 | 3374,337 | 2,39 | 3,03 | 0,65 |
| 194 | 162-982-B-8H-5, 80  | 69,30 | 76,13 |       |          | 2,43 | 3,07 | 0,58 |
| 195 | 162-982-C-8H-7, 40  | 70,20 | 75,99 | 76,69 | 3375,889 | 2,51 | 3,15 | 0,66 |
| 196 | 162-982-B-8H-5, 90  | 69,40 | 76,23 | 76,79 | 3377,441 | 2,35 | 2,99 | 0,51 |
| 197 | 162-982-B-8H-5, 100 | 69,50 | 76,33 |       |          | 2,54 | 3,18 | 0,46 |
| 198 | 162-982-C-8H-8, 0   | 70,34 | 76,13 | 76,89 | 3378,993 | 2,72 | 3,36 | 0,48 |
| 199 | 162-982-B-8H-5, 110 | 69,60 | 76,43 |       |          | 2,36 | 3,00 | 0,54 |
| 200 | 162-982-C-9H-1, 10  | 70,40 | 76,22 | 76,99 | 3385,777 | 2,49 | 3,13 | 0,59 |
| 201 | 162-982-B-8H-5, 120 | 69,70 | 76,53 |       |          | 2,28 | 2,92 | 0,54 |
| 202 | 162-982-C-8H-8, 18  | 70,52 | 76,31 | 77,09 | 3392,562 | 2,37 | 3,01 | 0,50 |
| 203 | 162-982-B-8H-5, 130 | 69,80 | 76,63 | 77,19 | 3395,104 | 2,28 | 2,92 | 0,71 |
| 204 | 162-982-C-9H-1, 30  | 70,60 | 76,42 | 77,23 | 3396,589 | 2,34 | 2,98 | 0,67 |
| 205 | 162-982-B-8H-5, 140 | 69,90 | 76,73 | 77,29 | 3398,645 | 2,29 | 2,93 | 0,47 |
| 206 | 162-982-B-8H-6, 0   | 70,00 | 76,83 | 77,39 | 3403,370 | 2,32 | 2,96 | 0,59 |

|     |                     |       |       |       |          |      |      |      |
|-----|---------------------|-------|-------|-------|----------|------|------|------|
| 207 | 162-982-B-8H-6, 10  | 70,10 | 76,93 |       |          | 2,29 | 2,93 | 0,29 |
| 208 | 162-982-C-9H-1, 50  | 70,80 | 76,62 | 77,49 | 3415,875 | 2,32 | 2,96 | 0,47 |
| 209 | 162-982-B-8H-6, 20  | 70,20 | 77,03 | 77,59 | 3419,402 | 2,37 | 3,01 | 0,17 |
| 210 | 162-982-B-8H-6, 30  | 70,30 | 77,13 |       |          | 2,43 | 3,07 | 0,24 |
| 211 | 162-982-C-9H-1, 90  | 71,20 | 76,82 | 77,69 | 3422,930 | 2,49 | 3,13 | 0,35 |
| 212 | 162-982-B-8H-6, 40  | 70,40 | 77,23 | 77,79 | 3426,143 | 2,41 | 3,05 | 0,32 |
| 213 | 162-982-B-8H-6, 50  | 70,50 | 77,33 | 77,89 | 3428,140 | 2,40 | 3,04 | 0,22 |
| 214 | 162-982-B-8H-6, 60  | 70,60 | 77,43 |       |          | 2,27 | 2,91 | 0,37 |
| 215 | 162-982-C-9H-1, 110 | 71,40 | 77,02 | 77,99 | 3430,137 | 2,36 | 3,00 | 0,64 |
| 216 | 162-982-B-8H-6, 70  | 70,70 | 77,53 |       |          | 2,28 | 2,92 | 0,51 |
| 217 | 162-982-C-9H-1, 130 | 71,60 | 77,22 | 78,09 | 3432,133 | 2,38 | 3,02 | 0,57 |
| 218 | 162-982-B-8H-6, 80  | 70,80 | 77,63 |       |          | 2,15 | 2,79 | 0,46 |
| 219 | 162-982-C-9H-2, 0   | 71,80 | 77,62 | 78,19 | 3434,130 | 2,29 | 2,93 | 0,69 |
| 220 | 162-982-B-8H-6, 90  | 70,90 | 77,73 |       |          | 2,27 | 2,91 | 0,67 |
| 221 | 162-982-C-9H-2, 20  | 72,00 | 77,82 | 78,29 | 3436,127 | 2,23 | 2,87 | 0,56 |
| 222 | 162-982-B-8H-6, 100 | 71,00 | 77,83 |       |          | 2,07 | 2,71 | 0,64 |
| 223 | 162-982-C-9H-2, 40  | 72,20 | 78,02 | 78,39 | 3438,124 | 2,09 | 2,73 | 0,60 |
| 224 | 162-982-B-8H-6, 110 | 71,10 | 77,93 | 78,49 | 3442,212 | 2,22 | 2,86 | 0,67 |
| 225 | 162-982-B-8H-6, 120 | 71,20 | 78,03 | 78,59 | 3446,699 | 2,13 | 2,77 | 0,75 |
| 226 | 162-982-B-8H-6, 130 | 71,30 | 78,13 |       |          | 2,32 | 2,96 | 0,59 |
| 227 | 162-982-C-9H-2, 60  | 72,40 | 78,22 | 78,69 | 3450,802 | 2,37 | 3,01 | 0,58 |
| 228 | 162-982-B-8H-6, 140 | 71,40 | 78,23 |       |          | 2,18 | 2,82 | 0,50 |
| 229 | 162-982-C-9H-2, 80  | 72,60 | 78,42 | 78,79 | 3452,069 | 2,39 | 3,03 | 0,61 |
| 230 | 162-982-A-8H-4, 22  | 69,92 | 78,70 |       |          | 2,41 | 3,05 | 0,62 |
| 231 | 162-982-B-8H-7, 0   | 71,50 | 78,33 | 78,89 | 3453,336 | 2,29 | 2,93 | 0,42 |
| 232 | 162-982-C-9H-2, 100 | 72,80 | 78,62 |       |          | 2,39 | 3,03 | 0,27 |
| 233 | 162-982-B-8H-7, 10  | 71,60 | 78,43 | 78,99 | 3454,604 | 2,25 | 2,89 | 0,66 |
| 234 | 162-982-C-9H-2, 120 | 73,00 | 78,82 | 79,04 | 3456,063 | 2,22 | 2,86 | 0,88 |
| 235 | 162-982-B-8H-7, 30  | 71,80 | 78,63 |       |          | 2,17 | 2,81 | 0,59 |
| 236 | 162-982-C-9H-2, 140 | 73,20 | 79,02 | 79,19 | 3460,440 | 2,16 | 2,80 | 0,86 |

|     |                     |       |       |       |          |      |      |      |
|-----|---------------------|-------|-------|-------|----------|------|------|------|
| 237 | 162-982-C-9H-3, 10  | 73,40 | 79,22 | 79,22 | 3461,855 | 2,19 | 2,83 | 0,78 |
| 238 | 162-982-A-8H-4, 32  | 70,02 | 78,80 |       |          | 2,40 | 3,04 | 0,89 |
| 239 | 162-982-B-8H-CC, 0  | 71,86 | 78,69 | 79,25 | 3463,269 | 2,50 | 3,14 | 0,45 |
| 240 | 162-982-C-9H-3, 30  | 73,60 | 79,42 |       |          | 2,26 | 2,90 | 0,93 |
| 241 | 162-982-A-8H-4, 42  | 70,12 | 78,90 |       |          | 2,31 | 2,95 | 0,96 |
| 242 | 162-982-B-8H-CC, 10 | 71,96 | 78,79 | 79,35 | 3467,566 | 2,53 | 3,17 | 0,62 |
| 243 | 162-982-C-9H-3, 50  | 73,80 | 79,62 |       |          | 2,30 | 2,94 | 0,82 |
| 244 | 162-982-B-8H-CC, 18 | 72,04 | 78,87 | 79,43 | 3470,859 | 2,34 | 2,98 | 0,55 |
| 245 | 162-982-C-9H-3, 70  | 74,00 | 79,82 |       |          | 2,28 | 2,92 | 0,79 |
| 246 | 162-982-A-8H-4, 52  | 70,22 | 79,00 | 79,56 | 3478,266 | 2,21 | 2,85 | 0,82 |
| 247 | 162-982-A-8H-4, 62  | 70,32 | 79,10 | 79,66 | 3483,964 | 2,10 | 2,74 | 0,80 |
| 248 | 162-982-A-8H-4, 72  | 70,42 | 79,20 | 79,76 | 3489,662 | 2,24 | 2,88 | 0,92 |
| 249 | 162-982-A-8H-4, 82  | 70,52 | 79,30 | 79,86 | 3495,360 | 2,20 | 2,84 | 0,90 |
| 250 | 162-982-A-8H-4, 92  | 70,62 | 79,40 | 79,96 | 3501,057 | 2,24 | 2,88 | 0,83 |
| 251 | 162-982-A-8H-4, 102 | 70,72 | 79,50 | 80,06 | 3506,755 | 2,26 | 2,90 | 0,79 |
| 252 | 162-982-C-9H-3, 90  | 74,20 | 80,02 | 80,09 | 3508,464 | 2,43 | 3,07 | 0,77 |
| 253 | 162-982-A-8H-4, 112 | 70,82 | 79,60 | 80,16 | 3512,453 | 2,34 | 2,98 | 0,85 |
| 254 | 162-982-A-8H-4, 122 | 70,92 | 79,70 | 80,26 | 3518,151 | 2,38 | 3,02 | 0,79 |
| 255 | 162-982-C-9H-3, 110 | 74,40 | 80,22 |       |          | 2,36 | 3,00 | 0,84 |
| 256 | 162-982-A-8H-4, 132 | 71,02 | 79,80 | 80,36 | 3523,848 | 2,35 | 2,99 | 0,75 |
| 257 | 162-982-A-8H-4, 142 | 71,12 | 79,90 | 80,50 | 3531,825 | 2,37 | 3,01 | 0,93 |
| 258 | 162-982-B-9H-1, 0   | 72,00 | 79,94 |       |          | 2,36 | 3,00 | 0,89 |
| 259 | 162-982-B-9H-1, 10  | 72,10 | 80,04 | 80,60 | 3532,763 | 2,34 | 2,98 | 0,82 |
| 260 | 162-982-B-9H-1, 20  | 72,20 | 80,14 | 80,70 | 3533,735 | 2,18 | 2,82 | 0,87 |
| 261 | 162-982-C-9H-3, 130 | 74,60 | 80,42 |       |          | 2,18 | 2,82 | 0,89 |
| 262 | 162-982-B-9H-1, 30  | 72,30 | 80,24 | 80,80 | 3534,706 | 2,34 | 2,98 | 0,83 |
| 263 | 162-982-C-9H-4, 0   | 74,80 | 80,62 | 80,85 | 3543,342 | 2,28 | 2,92 | 0,78 |
| 264 | 162-982-B-9H-1, 40  | 72,40 | 80,34 | 80,90 | 3535,677 | 2,31 | 2,95 | 0,82 |
| 265 | 162-982-B-9H-1, 50  | 72,50 | 80,44 | 81,00 | 3536,649 | 2,35 | 2,99 | 0,83 |
| 266 | 162-982-C-9H-4, 20  | 75,00 | 80,82 |       |          | 2,33 | 2,97 | 0,70 |

|     |                     |       |       |       |          |      |      |      |
|-----|---------------------|-------|-------|-------|----------|------|------|------|
| 267 | 162-982-B-9H-1, 60  | 72,60 | 80,54 | 81,10 | 3538,040 | 2,21 | 2,85 | 0,84 |
| 268 | 162-982-B-9H-1, 70  | 72,70 | 80,64 | 81,20 | 3540,240 | 2,12 | 2,76 | 0,76 |
| 269 | 162-982-B-9H-1, 80  | 72,80 | 80,74 | 81,30 | 3542,987 | 2,21 | 2,85 | 0,91 |
| 270 | 162-982-B-9H-1, 90  | 72,90 | 80,84 | 81,40 | 3545,903 | 2,31 | 2,95 | 0,62 |
| 271 | 162-982-C-9H-4, 40  | 75,20 | 81,02 |       |          | 2,49 | 3,13 | 0,39 |
| 272 | 162-982-B-9H-1, 100 | 73,00 | 80,94 | 81,50 | 3548,818 | 2,29 | 2,93 | 0,47 |
| 273 | 162-982-B-9H-1, 110 | 73,10 | 81,04 | 81,60 | 3551,733 | 2,49 | 3,13 | 0,60 |
| 274 | 162-982-C-9H-4, 60  | 75,40 | 81,22 |       |          | 2,62 | 3,26 | 0,99 |
| 275 | 162-982-B-9H-1, 120 | 73,20 | 81,14 | 81,70 | 3559,404 | 2,51 | 3,15 | 1,06 |
| 276 | 162-982-C-9H-4, 80  | 75,60 | 81,42 |       |          | 2,56 | 3,20 | 0,92 |
| 277 | 162-982-B-9H-1, 130 | 73,30 | 81,24 | 81,80 | 3562,237 | 2,42 | 3,06 | 0,91 |
| 278 | 162-982-B-9H-1, 140 | 73,40 | 81,34 | 81,90 | 3565,070 | 2,36 | 3,00 | 1,01 |
| 279 | 162-982-B-9H-2, 0   | 73,50 | 81,44 | 82,00 | 3567,120 | 2,36 | 3,00 | 1,02 |
| 280 | 162-982-B-9H-2, 10  | 73,60 | 81,54 | 82,10 | 3568,560 | 2,38 | 3,02 | 0,99 |
| 281 | 162-982-B-9H-2, 20  | 73,70 | 81,64 | 82,20 | 3570,001 | 2,33 | 2,97 | 0,75 |
| 282 | 162-982-B-9H-2, 30  | 73,80 | 81,74 | 82,30 | 3571,441 | 2,26 | 2,90 | 0,84 |
| 283 | 162-982-B-9H-2, 40  | 73,90 | 81,84 | 82,40 | 3572,882 | 2,18 | 2,82 | 0,92 |
| 284 | 162-982-C-9H-4, 100 | 75,80 | 81,62 |       |          | 2,39 | 3,03 | 0,86 |
| 285 | 162-982-C-9H-4, 120 | 76,00 | 81,82 | 82,55 | 3575,107 | 2,33 | 2,97 | 0,76 |
| 286 | 162-982-B-9H-2, 60  | 74,10 | 82,04 | 82,60 | 3576,004 | 2,29 | 2,93 | 0,95 |
| 287 | 162-982-C-9H-4, 140 | 76,20 | 82,02 |       |          | 2,36 | 3,00 | 0,93 |
| 288 | 162-982-B-9H-2, 70  | 74,20 | 82,14 | 82,70 | 3577,798 | 2,42 | 3,06 | 1,05 |
| 289 | 162-982-C-9H-5, 0   | 76,30 | 82,12 | 82,73 | 3578,246 | 2,48 | 3,12 | 0,94 |
| 290 | 162-982-B-9H-2, 80  | 74,30 | 82,24 | 82,80 | 3579,592 | 2,41 | 3,05 | 1,04 |
| 291 | 162-982-C-9H-5, 10  | 76,40 | 82,22 | 82,85 | 3580,488 | 2,50 | 3,14 | 0,92 |
| 292 | 162-982-B-9H-2, 90  | 74,40 | 82,34 | 82,90 | 3581,954 | 2,44 | 3,08 | 0,92 |
| 293 | 162-982-B-9H-2, 100 | 74,50 | 82,44 | 83,00 | 3588,424 | 2,51 | 3,15 | 0,94 |
| 294 | 162-982-C-9H-5, 30  | 76,60 | 82,42 |       |          | 2,49 | 3,13 | 1,01 |
| 295 | 162-982-C-9H-5, 50  | 76,80 | 82,62 | 83,05 | 3590,610 | 2,45 | 3,09 | 0,84 |

|     |                     |       |       |       |          |      |      |      |
|-----|---------------------|-------|-------|-------|----------|------|------|------|
| 296 | 162-982-B-9H-2, 110 | 74,60 | 82,54 |       |          |      |      |      |
| 297 | 162-982-C-9H-5, 70  | 77,00 | 82,82 | 83,10 | 3592,796 | 2,28 | 2,92 | 0,71 |
| 298 | 162-982-B-9H-2, 120 | 74,70 | 82,64 |       |          | 2,31 | 2,95 | 0,75 |
| 299 | 162-982-C-9H-5, 90  | 77,20 | 83,02 | 83,20 | 3595,045 | 2,31 | 2,95 | 0,73 |
| 300 | 162-982-B-9H-2, 130 | 74,80 | 82,74 | 83,30 | 3596,507 | 2,38 | 3,02 | 0,83 |
| 301 | 162-982-B-9H-2, 140 | 74,90 | 82,84 | 83,40 | 3597,970 | 2,30 | 2,94 | 0,96 |
| 302 | 162-982-B-9H-3, 0   | 75,00 | 82,94 | 83,50 | 3600,331 | 2,27 | 2,91 | 0,85 |
| 303 | 162-982-B-9H-3, 10  | 75,10 | 83,04 |       |          | 2,21 | 2,85 | 0,66 |
| 304 | 162-982-C-9H-5, 110 | 77,40 | 83,22 | 83,60 | 3607,065 | 2,21 | 2,85 | 0,58 |
| 305 | 162-982-B-9H-3, 20  | 75,20 | 83,14 | 83,70 | 3612,142 | 2,25 | 2,89 | 0,80 |
| 306 | 162-982-B-9H-3, 30  | 75,30 | 83,24 | 83,80 | 3617,374 | 2,21 | 2,85 | 0,80 |
| 307 | 162-982-B-9H-3, 40  | 75,40 | 83,34 | 83,90 | 3622,607 | 2,37 | 3,01 | 0,56 |
| 308 | 162-982-B-9H-3, 50  | 75,50 | 83,44 | 84,00 | 3624,624 | 2,53 | 3,17 | 0,57 |
| 309 | 162-982-C-9H-5, 130 | 77,60 | 83,42 | 84,05 | 3625,364 | 2,51 | 3,15 | 0,64 |
| 310 | 162-982-B-9H-3, 60  | 75,60 | 83,54 | 84,10 | 3626,105 | 2,43 | 3,07 | 0,52 |
| 311 | 162-982-B-9H-3, 70  | 75,70 | 83,64 | 84,20 | 3627,586 | 2,56 | 3,20 | 0,78 |
| 312 | 162-982-B-9H-3, 80  | 75,80 | 83,74 |       |          | 2,32 | 2,96 | 0,73 |
| 313 | 162-982-C-9H-6, 0   | 77,80 | 83,62 | 84,30 | 3629,067 | 2,67 | 3,31 | 0,75 |
| 314 | 162-982-B-9H-3, 90  | 75,90 | 83,84 | 84,40 | 3631,737 | 2,69 | 3,33 | 0,62 |
| 315 | 162-982-B-9H-3, 100 | 76,00 | 83,94 | 84,50 | 3635,042 | 2,65 | 3,29 | 0,91 |
| 316 | 162-982-B-9H-3, 110 | 76,10 | 84,04 |       |          | 2,44 | 3,08 | 0,59 |
| 317 | 162-982-C-9H-6, 20  | 78,00 | 83,82 | 84,60 | 3638,347 | 2,25 | 2,89 | 0,78 |
| 318 | 162-982-B-9H-3, 120 | 76,20 | 84,14 | 84,70 | 3641,272 | 2,38 | 3,02 | 0,73 |
| 319 | 162-982-C-9H-6, 40  | 78,20 | 84,02 |       |          | 2,36 | 3,00 | 0,64 |
| 320 | 162-982-C-9H-6, 60  | 78,40 | 84,22 | 84,75 | 3642,574 | 2,42 | 3,06 | 0,67 |
| 321 | 162-982-B-9H-3, 130 | 76,30 | 84,24 |       |          | 2,36 | 3,00 | 0,73 |
| 322 | 162-982-C-9H-6, 80  | 78,60 | 84,42 | 84,80 | 3643,875 | 2,13 | 2,77 | 0,73 |
| 323 | 162-982-B-9H-3, 140 | 76,40 | 84,34 | 84,90 | 3646,141 | 2,24 | 2,88 | 0,93 |
| 324 | 162-982-B-9H-4, 0   | 76,50 | 84,44 |       |          | 2,24 | 2,88 | 0,93 |
| 325 | 162-982-C-9H-6, 100 | 78,80 | 84,62 | 85,00 | 3648,407 | 2,28 | 2,92 | 0,03 |
|     |                     |       |       |       |          | 2,30 | 2,94 | 0,90 |

|     |                     |       |       |       |          |      |      |      |
|-----|---------------------|-------|-------|-------|----------|------|------|------|
| 326 | 162-982-B-9H-4, 10  | 76,60 | 84,54 | 85,10 | 3650,673 | 2,19 | 2,83 | 0,63 |
| 327 | 162-982-B-9H-4, 20  | 76,70 | 84,64 | 85,20 | 3655,705 | 2,41 | 3,05 | 0,82 |
| 328 | 162-982-B-9H-4, 30  | 76,80 | 84,74 | 85,30 | 3660,330 | 2,33 | 2,97 | 0,15 |
| 329 | 162-982-B-9H-4, 40  | 76,90 | 84,84 | 85,40 | 3662,907 | 2,46 | 3,10 | 0,72 |
| 330 | 162-982-B-9H-4, 50  | 77,00 | 84,94 | 85,50 | 3665,484 | 2,58 | 3,22 | 0,63 |
| 331 | 162-982-B-9H-4, 60  | 77,10 | 85,04 | 85,60 | 3667,479 | 2,61 | 3,25 | 0,42 |
| 332 | 162-982-B-9H-4, 70  | 77,20 | 85,14 | 85,70 | 3668,808 | 2,53 | 3,17 | 0,45 |
| 333 | 162-982-B-9H-4, 80  | 77,30 | 85,24 | 85,80 | 3670,137 | 2,77 | 3,41 | 0,48 |
| 334 | 162-982-B-9H-4, 90  | 77,40 | 85,34 | 85,90 | 3671,321 | 2,65 | 3,29 | 0,43 |
| 335 | 162-982-B-9H-4, 100 | 77,50 | 85,44 | 86,00 | 3672,460 | 2,62 | 3,26 | 0,28 |
| 336 | 162-982-B-9H-4, 110 | 77,60 | 85,54 | 86,10 | 3673,600 | 2,52 | 3,16 | 0,50 |
| 337 | 162-982-B-9H-4, 120 | 77,70 | 85,64 | 86,20 | 3675,839 | 2,53 | 3,17 | 0,46 |
| 338 | 162-982-B-9H-4, 130 | 77,80 | 85,74 | 86,30 | 3683,710 | 2,26 | 2,90 | 0,36 |
| 339 | 162-982-B-9H-4, 140 | 77,90 | 85,84 | 86,40 | 3685,220 | 2,23 | 2,87 | 0,65 |
| 340 | 162-982-B-9H-5, 0   | 78,00 | 85,94 | 86,50 | 3688,330 | 2,35 | 2,99 | 0,66 |
| 341 | 162-982-B-9H-5, 10  | 78,10 | 86,04 | 86,60 | 3691,487 | 2,62 | 3,26 | 0,65 |
| 342 | 162-982-B-9H-5, 20  | 78,20 | 86,14 | 86,70 | 3694,557 | 2,36 | 3,00 | 0,32 |
| 343 | 162-982-B-9H-5, 30  | 78,30 | 86,24 | 86,80 | 3697,273 | 2,30 | 2,94 | 0,36 |
| 344 | 162-982-B-9H-5, 40  | 78,40 | 86,34 | 86,90 | 3699,678 | 2,29 | 2,93 | 0,30 |
| 345 | 162-982-B-9H-5, 50  | 78,50 | 86,44 | 87,00 | 3702,027 | 2,17 | 2,81 | 0,31 |

---

**Table S2.** Listing of stratigraphic tie points between holes 982-A, -B, and -C and revised composite depths (c.d.) at 59–85 m c.d. deduced on the basis of joint marine isotope  $\delta^{18}\text{O}$  oscillations. Previous composite depths are from the Shipboard Scientific Party (1996).

| Tie point # | Sample ID           | MBSF  | (previous)<br>MCD | new<br>MCD |
|-------------|---------------------|-------|-------------------|------------|
| 1           | 162-982-A-6H-5, 37  | 52.57 | 59.10             | 59.17      |
| 2           | 162-982-B-7H-1, 40  | 53.40 | 59.17             |            |
| 3           | 162-982-B-7H-1, 50  | 53.50 | 59.27             | 59.27      |
| 4           | 162-982-A-6H-5, 47  | 52.67 | 59.20             |            |
| 5           | 162-982-B-7H-1, 60  | 53.60 | 59.37             | 59.37      |
| 6           | 162-982-A-6H-5, 57  | 52.77 | 59.30             |            |
| 7           | 162-982-B-7H-1, 70  | 53.70 | 59.47             | 59.47      |
| 8           | 162-982-A-6H-5, 67  | 52.87 | 59.40             |            |
| 9           | 162-982-B-7H-1, 90  | 53.90 | 59.67             | 59.67      |
| 10          | 162-982-A-6H-5, 87  | 53.07 | 59.60             |            |
| 11          | 162-982-B-7H-1, 97  | 53.97 | 59.74             | 59.74      |
| 12          | 162-982-A-6H-5, 97  | 53.17 | 59.69             |            |
| 13          | 162-982-B-7H-4, 12  | 57.62 | 63.39             | 63.39      |
| 14          | 162-982-A-7H-1, 0,5 | 55.75 | 63.68             |            |
| 15          | 162-982-B-7H-6, 10  | 60.60 | 66.37             | 66.37      |
| 16          | 162-982-A-7H-2, 107 | 58.27 | 66.24             |            |
| 17          | 162-982-C-8H-1, 3   | 60.83 | 66.62             |            |
| 18          | 162-982-B-7H-6, 20  | 60.70 | 66.47             | 66.47      |
| 19          | 162-982-A-7H-2, 112 | 58.32 | 66.29             |            |
| 20          | 162-982-B-7H-6, 40  | 60.90 | 66.67             | 66.67      |
| 21          | 162-982-A-7H-3, 0   | 58.70 | 66.67             |            |
| 22          | 162-982-B-7H-6, 50  | 61.00 | 66.77             | 66.77      |
| 23          | 162-982-A-7H-3, 7   | 58.77 | 66.74             |            |
| 24          | 162-982-B-7H-6, 60  | 61.10 | 66.87             | 66.87      |
| 25          | 162-982-A-7H-3, 17  | 58.87 | 66.84             |            |
| 26          | 162-982-B-7H-6, 70  | 61.20 | 66.97             | 66.97      |
| 27          | 162-982-A-7H-3, 27  | 58.97 | 66.94             |            |
| 28          | 162-982-B-7H-6, 80  | 61.30 | 67.07             | 67.07      |
| 29          | 162-982-A-7H-3, 37  | 59.07 | 67.04             |            |
| 30          | 162-982-B-7H-6, 90  | 61.40 | 67.17             | 67.17      |
| 31          | 162-982-A-7H-3, 47  | 59.17 | 67.14             |            |
| 32          | 162-982-B-7H-6, 100 | 61.50 | 67.27             | 67.27      |
| 33          | 162-982-A-7H-3, 52  | 59.22 | 67.19             |            |
| 34          | 162-982-C-8H-1, 80  | 61.60 | 67.39             |            |
| 35          | 162-982-B-7H-6, 140 | 61.90 | 67.67             | 67.67      |
| 36          | 162-982-A-7H-3, 72  | 59.42 | 67.39             |            |
| 37          | 162-982-B-7H-7, 0   | 62.00 | 67.77             | 67.77      |
| 38          | 162-982-A-7H-3, 82  | 59.52 | 67.49             |            |
| 39          | 162-982-C-8H-1, 100 | 61.80 | 67.59             |            |
| 40          | 162-982-B-7H-7, 10  | 62.10 | 67.87             | 67.87      |
| 41          | 162-982-A-7H-3, 92  | 59.62 | 67.59             |            |



|    |                     |       |       |       |
|----|---------------------|-------|-------|-------|
| 42 | 162-982-B-7H-7, 20  | 62.20 | 67.97 |       |
| 43 | 162-982-A-7H-3, 102 | 59.72 | 67.69 | 67.97 |
| 44 | 162-982-B-7H-7, 30  | 62.30 | 68.07 |       |
| 45 | 162-982-A-7H-3, 112 | 59.82 | 67.79 | 68.07 |
| 46 | 162-982-A-7H-3, 117 | 59.87 | 67.84 |       |
| 47 | 162-982-B-7H-7, 40  | 62.40 | 68.17 | 68.17 |
| 48 | 162-982-C-8H-2, 10  | 62.40 | 68.19 |       |
| 49 | 162-982-B-7H-CC, 0  | 62.49 | 68.26 | 68.26 |
| 50 | 162-982-A-7H-3, 122 | 59.92 | 67.89 |       |
| 51 | 162-982-B-7H-CC, 10 | 62.59 | 68.36 |       |
| 52 | 162-982-A-7H-3, 137 | 60.07 | 68.04 | 68.36 |
| 53 | 162-982-C-8H-2, 30  | 62.60 | 68.39 |       |
| 54 | 162-982-A-7H-4, 15  | 60.35 | 68.32 | 68.47 |
| 55 | 162-982-A-7H-4, 98  | 61.18 | 69.15 |       |
| 56 | 162-982-C-8H-2, 110 | 63.40 | 69.19 | 69.30 |
| 57 | 162-982-A-7H-4, 114 | 61.34 | 69.31 |       |
| 58 | 162-982-C-8H-2, 130 | 63.60 | 69.39 | 69.51 |
| 59 | 162-982-A-7H-4, 120 | 61.40 | 69.37 |       |
| 60 | 162-982-C-8H-3, 1   | 63.81 | 69.60 | 69.73 |
| 61 | 162-982-C-8H-3, 20  | 64.00 | 69.79 |       |
| 62 | 162-982-A-7H-4, 128 | 61.48 | 69.45 | 69.93 |
| 63 | 162-982-C-8H-3, 60  | 64.40 | 70.19 |       |
| 64 | 162-982-B-8H-1, 45  | 62.95 | 69.78 | 70.35 |
| 65 | 162-982-A-7H-4, 135 | 61.55 | 69.52 |       |
| 66 | 162-982-C-8H-3, 80  | 64.60 | 70.39 |       |
| 67 | 162-982-B-8H-1, 110 | 63.60 | 70.43 | 70.56 |
| 68 | 162-982-B-8H-2, 15  | 64.15 | 70.98 |       |
| 69 | 162-982-C-8H-3, 100 | 64.80 | 70.59 | 70.76 |
| 70 | 162-982-B-8H-2, 70  | 64.70 | 71.53 |       |
| 71 | 162-982-C-8H-3, 140 | 65.20 | 70.99 | 71.18 |
| 72 | 162-982-C-8H-4, 10  | 65.40 | 71.19 |       |
| 73 | 162-982-B-8H-2, 140 | 65.40 | 72.23 | 71.39 |
| 74 | 162-982-B-8H-3, 30  | 65.80 | 72.63 |       |
| 75 | 162-982-C-8H-4, 130 | 66.60 | 72.39 | 72.51 |
| 76 | 162-982-C-8H-5, 60  | 67.40 | 73.19 |       |
| 77 | 162-982-B-8H-3, 32  | 65.82 | 72.65 | 73.21 |
| 78 | 162-982-C-8H-5, 100 | 67.80 | 73.59 |       |
| 79 | 162-982-B-8H-3, 62  | 66.12 | 72.95 | 73.51 |
| 80 | 162-982-C-8H-6, 10  | 68.40 | 74.19 |       |
| 81 | 162-982-B-8H-4, 5   | 67.05 | 73.88 | 74.44 |
| 82 | 162-982-C-8H-6, 30  | 68.60 | 74.39 |       |
| 83 | 162-982-B-8H-4, 20  | 67.20 | 74.03 | 74.59 |
| 84 | 162-982-C-8H-6, 50  | 68.80 | 74.59 |       |
| 85 | 162-982-B-8H-4, 92  | 67.92 | 74.75 | 75.31 |

|     |                     |       |       |       |
|-----|---------------------|-------|-------|-------|
| 86  | 162-982-C-8H-6, 70  | 69.00 | 74.79 |       |
| 87  | 162-982-B-8H-4, 110 | 68.10 | 74.93 | 75.49 |
| 88  | 162-982-C-8H-6, 110 | 69.40 | 75.19 |       |
| 89  | 162-982-B-8H-5, 20  | 68.70 | 75.53 | 76.09 |
| 90  | 162-982-C-8H-7, 0   | 69.80 | 75.59 |       |
| 91  | 162-982-B-8H-5, 50  | 69.00 | 75.83 | 76.39 |
| 92  | 162-982-C-8H-7, 20  | 70.00 | 75.79 |       |
| 93  | 162-982-B-8H-5, 70  | 69.20 | 76.03 | 76.59 |
| 94  | 162-982-C-8H-7, 40  | 70.20 | 75.99 |       |
| 95  | 162-982-B-8H-5, 80  | 69.30 | 76.13 | 76.69 |
| 96  | 162-982-B-8H-5, 90  | 69.40 | 76.23 |       |
| 97  | 162-982-A-8H-1, 145 | 66.65 | 75.43 | 76.79 |
| 98  | 162-982-C-8H-8, 0   | 70.34 | 76.13 |       |
| 99  | 162-982-B-8H-5, 100 | 69.50 | 76.33 | 76.89 |
| 100 | 162-982-A-8H-2, 10  | 66.80 | 75.58 |       |
| 101 | 162-982-C-9H-1, 10  | 70.40 | 76.22 |       |
| 102 | 162-982-B-8H-5, 110 | 69.60 | 76.43 | 76.99 |
| 103 | 162-982-A-8H-2, 25  | 66.95 | 75.73 |       |
| 104 | 162-982-C-8H-8, 18  | 70.52 | 76.31 |       |
| 105 | 162-982-B-8H-5, 122 | 69.72 | 76.53 | 77.09 |
| 106 | 162-982-A-8H-2, 70  | 67.40 | 76.18 |       |
| 107 | 162-982-C-9H-1, 50  | 70.80 | 76.62 |       |
| 108 | 162-982-B-8H-6, 10  | 70.10 | 76.93 | 77.49 |
| 109 | 162-982-A-8H-2, 100 | 67.70 | 76.48 |       |
| 110 | 162-982-C-9H-1, 90  | 71.20 | 76.82 |       |
| 111 | 162-982-B-8H-6, 30  | 70.30 | 77.13 | 77.69 |
| 112 | 162-982-A-8H-2, 130 | 68.00 | 76.78 |       |
| 113 | 162-982-C-9H-1, 110 | 71.40 | 77.02 |       |
| 114 | 162-982-B-8H-6, 60  | 70.60 | 77.43 | 77.99 |
| 115 | 162-982-A-8H-3, 10  | 68.30 | 77.08 |       |
| 116 | 162-982-C-9H-1, 130 | 71.60 | 77.22 |       |
| 117 | 162-982-B-8H-6, 70  | 70.70 | 77.53 | 78.09 |
| 118 | 162-982-C-9H-2, 0   | 71.80 | 77.62 |       |
| 119 | 162-982-B-8H-6, 80  | 70.80 | 77.63 | 78.19 |
| 120 | 162-982-A-8H-3, 40  | 68.60 | 77.38 |       |
| 121 | 162-982-C-9H-2, 20  | 72.00 | 77.82 |       |
| 122 | 162-982-B-8H-6, 90  | 70.90 | 77.73 | 78.29 |
| 123 | 162-982-C-9H-2, 40  | 72.20 | 78.02 |       |
| 124 | 162-982-B-8H-6, 100 | 71.00 | 77.83 | 78.39 |
| 125 | 162-982-A-8H-3, 70  | 68.90 | 77.68 |       |
| 126 | 162-982-B-8H-6, 122 | 71.22 | 78.03 |       |
| 127 | 162-982-A-8H-3, 100 | 69.20 | 77.98 | 78.59 |
| 128 | 162-982-C-9H-2, 60  | 72.40 | 78.22 |       |
| 129 | 162-982-B-8H-6, 130 | 71.30 | 78.13 | 78.69 |
| 130 | 162-982-A-8H-3, 130 | 69.50 | 78.28 |       |

|     |                     |       |       |       |
|-----|---------------------|-------|-------|-------|
| 131 | 162-982-C-9H-2, 80  | 72.60 | 78.42 |       |
| 132 | 162-982-B-8H-6, 140 | 71.40 | 78.23 | 78.79 |
| 133 | 162-982-A-4H-4, 0   | 69.70 | 78.48 |       |
| 134 | 162-982-C-9H-2, 100 | 72.80 | 78.62 |       |
| 135 | 162-982-B-8H-7, 0   | 71.50 | 78.33 | 78.89 |
| 136 | 162-982-A-8H-4, 22  | 69.92 | 78.70 |       |
| 137 | 162-982-C-9H-2, 140 | 73.20 | 79.02 |       |
| 138 | 162-982-B-8H-7, 30  | 71.80 | 78.63 | 79.19 |
| 139 | 162-982-A-8H-4, 30  | 70.00 | 78.78 |       |
| 140 | 162-982-C-9H-3, 30  | 73.60 | 79.42 |       |
| 141 | 162-982-B-8H-CC, 0  | 71.86 | 78.69 | 79.25 |
| 142 | 162-982-A-8H-4, 32  | 70.02 | 78.80 |       |
| 143 | 162-982-C-9H-3, 50  | 73.80 | 79.62 |       |
| 144 | 162-982-B-8H-CC, 10 | 71.96 | 78.79 | 79.35 |
| 145 | 162-982-A-8H-4, 42  | 70.12 | 78.90 |       |
| 146 | 162-982-C-9H-3, 70  | 74.00 | 79.82 |       |
| 147 | 162-982-B-8H-CC, 18 | 72.04 | 78.87 | 79.43 |
| 148 | 162-982-C-9H-3, 90  | 74.20 | 80.02 |       |
| 149 | 162-982-A-8H-4, 105 | 70.75 | 79.53 | 80.09 |
| 150 | 162-982-C-9H-3, 110 | 74.40 | 80.22 |       |
| 151 | 162-982-A-8H-4, 122 | 70.92 | 79.70 | 80.26 |
| 152 | 162-982-B-9H-1, 0   | 72.00 | 79.94 |       |
| 153 | 162-982-A-8H-4, 142 | 71.12 | 79.90 | 80.50 |
| 154 | 162-982-C-9H-3, 130 | 74.60 | 80.42 |       |
| 155 | 162-982-B-9H-1, 20  | 72.20 | 80.14 | 80.70 |
| 156 | 162-982-A-8H-5, 15  | 71.35 | 80.13 |       |
| 157 | 162-982-B-9H-1, 30  | 72.30 | 80.24 |       |
| 158 | 162-982-A-8H-5, 30  | 71.50 | 80.28 | 80.80 |
| 159 | 162-982-C-9H-4, 20  | 75.00 | 80.82 |       |
| 160 | 162-982-B-9H-1, 50  | 72.50 | 80.44 | 81.00 |
| 161 | 162-982-A-8H-5, 45  | 71.65 | 80.43 |       |
| 162 | 162-982-B-9H-1, 80  | 72.80 | 80.74 |       |
| 163 | 162-982-A-8H-5, 90  | 72.10 | 80.88 | 81.30 |
| 164 | 162-982-C-9H-4, 40  | 75.20 | 81.02 |       |
| 165 | 162-982-B-9H-1, 90  | 72.90 | 80.84 | 81.40 |
| 166 | 162-982-C-9H-4, 60  | 75.40 | 81.22 |       |
| 167 | 162-982-B-9H-1, 110 | 73.10 | 81.04 | 81.60 |
| 168 | 162-982-C-9H-4, 80  | 75.60 | 81.42 |       |
| 169 | 162-982-B-9H-1, 122 | 73.22 | 81.14 | 81.70 |
| 170 | 162-982-C-9H-4, 100 | 75.80 | 81.62 |       |
| 171 | 162-982-B-9H-2, 40  | 73.90 | 81.84 | 82.40 |
| 172 | 162-982-C-9H-4, 120 | 76.00 | 81.82 |       |
| 173 | 162-982-B-9H-2, 55  | 74.05 | 81.99 | 82.55 |
| 174 | 162-982-C-9H-4, 140 | 76.20 | 82.02 |       |
| 175 | 162-982-B-9H-2, 60  | 74.10 | 82.04 | 82.60 |

|     |                     |       |       |       |
|-----|---------------------|-------|-------|-------|
| 176 | 162-982-C-9H-5, 10  | 76.40 | 82.22 | 82.85 |
| 177 | 162-982-B-9H-2, 85  | 74.35 | 82.29 |       |
| 178 | 162-982-C-9H-5, 30  | 76.60 | 82.42 | 83.00 |
| 179 | 162-982-B-9H-2, 100 | 74.50 | 82.44 |       |
| 180 | 162-982-C-9H-5, 70  | 77.00 | 82.82 | 83.10 |
| 181 | 162-982-B-9H-2, 110 | 74.60 | 82.54 |       |
| 182 | 162-982-C-9H-5, 90  | 77.20 | 83.02 | 83.20 |
| 183 | 162-982-B-9H-2, 120 | 74.70 | 82.64 |       |
| 184 | 162-982-C-9H-5, 110 | 77.40 | 83.22 | 83.60 |
| 185 | 162-982-B-9H-3, 10  | 75.10 | 83.04 |       |
| 186 | 162-982-C-9H-5, 130 | 77.60 | 83.42 | 84.05 |
| 187 | 162-982-B-9H-3, 55  | 75.55 | 83.49 |       |
| 188 | 162-982-C-9H-6, 0   | 77.80 | 83.62 | 84.30 |
| 189 | 162-982-B-9H-3, 80  | 75.80 | 83.74 |       |
| 190 | 162-982-C-9H-6, 20  | 78.00 | 83.82 | 84.60 |
| 191 | 162-982-B-9H-3, 110 | 76.10 | 84.04 |       |
| 192 | 162-982-C-9H-6, 40  | 78.20 | 84.02 | 84.70 |
| 193 | 162-982-B-9H-3, 120 | 76.20 | 84.14 |       |
| 194 | 162-982-C-9H-6, 80  | 78.60 | 84.42 | 84.80 |
| 195 | 162-982-B-9H-3, 130 | 76.30 | 84.24 |       |
| 196 | 162-982-C-9H-6, 100 | 78.80 | 84.62 | 85.00 |
| 197 | 162-982-B-9H-4, 0   | 76.50 | 84.44 |       |

---

**Table S3.** Summary of alkenone unsaturation index ( $U_{37}^k$ ) data measured in this study at ODP Site 982A.

| Sample # | Sample ID             | MBSF   | (previous) MCD | new MCD | AGE (kyr) | Alkenones (ng/g) | $U_{37}^k$ T°C (Prah1 1988) |
|----------|-----------------------|--------|----------------|---------|-----------|------------------|-----------------------------|
| 1        | 162-982-A-7H-3, 25.5  | 58.955 | 66.925         | 66.955  | 2988.497  | 67.8             | 16.0                        |
| 2        | 162-982-A-7H-3, 35.5  | 59.055 | 67.025         | 67.055  | 2990.631  | 59.6             | 19.5                        |
| 3        | 162-982-A-7H-3, 45.5  | 59.155 | 67.125         | 67.155  | 2992.723  | 83.6             | 17.0                        |
| 4        | 162-982-A-7H-3, 55.5  | 59.255 | 67.225         | 67.309  | 2995.020  | 129.7            | 15.1                        |
| 5        | 162-982-A-7H-3, 65.5  | 59.355 | 67.325         | 67.562  | 2999.326  | 107.7            | 15.9                        |
| 6        | 162-982-A-7H-3, 75.5  | 59.455 | 67.425         | 67.705  | 3001.927  | 58.2             | 16.8                        |
| 7        | 162-982-A-7H-3, 85.5  | 59.555 | 67.525         | 67.805  | 3003.765  | 549.3            | 15.0                        |
| 8        | 162-982-A-7H-3, 95.5  | 59.655 | 67.625         | 67.905  | 3005.895  | 88.5             | 13.4                        |
| 9        | 162-982-A-7H-3, 105.5 | 59.755 | 67.725         | 68.012  | 3008.769  | 138.4            | 13.2                        |
| 10       | 162-982-A-7H-3, 115.5 | 59.855 | 67.825         | 68.137  | 3012.147  | 189.9            | 12.2                        |
| 11       | 162-982-A-7H-3, 125.5 | 59.955 | 67.925         | 68.283  | 3021.027  | 99.8             | 12.2                        |
| 12       | 162-982-A-7H-3, 145.5 | 60.155 | 68.125         | 68.419  | 3024.242  | 113.1            | 12.2                        |
| 13       | 162-982-A-7H-4, 2     | 60.220 | 68.190         | 68.497  | 3025.691  | 123.4            | 13.4                        |
| 14       | 162-982-A-7H-4, 13    | 60.330 | 68.300         | 68.535  | 3025.833  | 85.8             | 13.1                        |
| 15       | 162-982-A-7H-4, 19    | 60.390 | 68.360         | 68.556  | 3025.910  | 160.5            | 14.5                        |
| 16       | 162-982-A-7H-4, 28    | 60.480 | 68.450         | 68.600  | 3026.600  | 165.9            | 14.0                        |
| 17       | 162-982-A-7H-4, 40    | 60.600 | 68.570         | 68.720  | 3028.734  | 162.6            | 15.2                        |
| 18       | 162-982-A-7H-4, 53    | 60.730 | 68.700         | 68.850  | 3032.007  | 69.2             | 14.0                        |
| 19       | 162-982-A-7H-4, 60    | 60.800 | 68.770         | 68.920  | 3034.853  | 95.9             | 16.0                        |
| 20       | 162-982-A-7H-4, 70    | 60.900 | 68.870         | 69.020  | 3037.197  | 99.9             | 14.3                        |
| 21       | 162-982-A-7H-4, 80    | 61.000 | 68.970         | 69.120  | 3039.742  | 93.8             | 15.8                        |
| 22       | 162-982-A-7H-4, 88    | 61.080 | 69.050         | 69.200  | 3042.225  | 86.5             | 15.1                        |
| 23       | 162-982-A-7H-4, 96.5  | 61.165 | 69.135         | 69.285  | 3045.158  | 72.9             | 15.1                        |
| 24       | 162-982-A-7H-4, 108   | 61.280 | 69.250         | 69.417  | 3048.049  | 108.5            | 14.8                        |
| 25       | 162-982-A-7H-4, 116   | 61.360 | 69.330         | 69.583  | 3049.901  | 84.9             | 15.0                        |
| 26       | 162-982-A-7H-4, 148   | 61.680 | 69.650         | 70.363  | 3191.328  | 92.9             | 15.1                        |
| 27       | 162-982-A-7H-5, 12    | 61.820 | 69.790         | 70.375  | 3192.563  | 94.4             | 14.6                        |
| 28       | 162-982-A-7H-5, 32    | 62.020 | 69.990         | 70.415  | 3195.750  | 85.8             | 16.4                        |
| 29       | 162-982-A-7H-5, 52    | 62.220 | 70.190         | 70.472  | 3198.250  | 108.5            | 17.0                        |

|    |                     |        |        |        |          |       |      |
|----|---------------------|--------|--------|--------|----------|-------|------|
| 30 | 162-982-A-7H-5, 72  | 62.420 | 70.390 | 70.508 | 3199.750 | 119.2 | 17.0 |
| 31 | 162-982-A-7H-5, 92  | 62.620 | 70.590 | 70.612 | 3202.750 | 106.5 | 15.3 |
| 32 | 162-982-A-7H-5, 112 | 62.820 | 70.790 | 70.719 | 3206.250 | 132.1 | 15.3 |
| 33 | 162-982-A-7H-5, 133 | 63.030 | 71.000 | 70.805 | 3212.000 | 128.0 | 16.2 |
| 34 | 162-982-A-7H-5, 143 | 63.130 | 71.100 | 70.879 | 3215.313 | 117.5 | 16.4 |
| 35 | 162-982-A-7H-6, 3   | 63.230 | 71.200 | 70.953 | 3218.440 | 128.8 | 16.4 |
| 36 | 162-982-A-7H-6, 23  | 63.430 | 71.400 | 71.055 | 3222.250 | 72.4  | 19.3 |
| 37 | 162-982-A-7H-6, 43  | 63.630 | 71.600 | 71.089 | 3223.375 | 76.8  | 21.4 |
| 38 | 162-982-A-7H-6, 63  | 63.830 | 71.800 | 71.173 | 3226.500 | 81.4  | 17.7 |
| 39 | 162-982-A-7H-6, 83  | 64.030 | 72.000 | 71.272 | 3234.000 | 82.6  | 18.2 |
| 40 | 162-982-A-7H-6, 103 | 64.230 | 72.200 | 71.310 | 3238.750 | 63.3  | 18.7 |
| 41 | 162-982-A-7H-6, 123 | 64.430 | 72.400 | 71.316 | 3239.575 | 79.2  | 18.6 |

---
